# Supplementary material for: Enhancement and modulation of valley polarization in Janus CrSSe with internal and external electric fields
Source: Royal Society of Chemistry journal article supplement (doi:10.1039/d3cp05298b), 2024-01-01
Supplement: d3cp05298b2.pdf [file d3cp05298b2.pdf]

**Table S1 Valley polarization Values of different materials and stacking conditions**

|       | I  | II | III | IV | V  | VI |
|-------|----|----|-----|----|----|----|
| CrSe2 | 48 | 42 | 30  | 28 | 17 | 32 |
| CrS2  | 13 | 19 | 15  | 14 | 12 | 22 |
| S     | 18 | 8  | 13  | 18 | 23 | 23 |
| Se    | 29 | 80 | 60  | 71 | 2  | 32 |

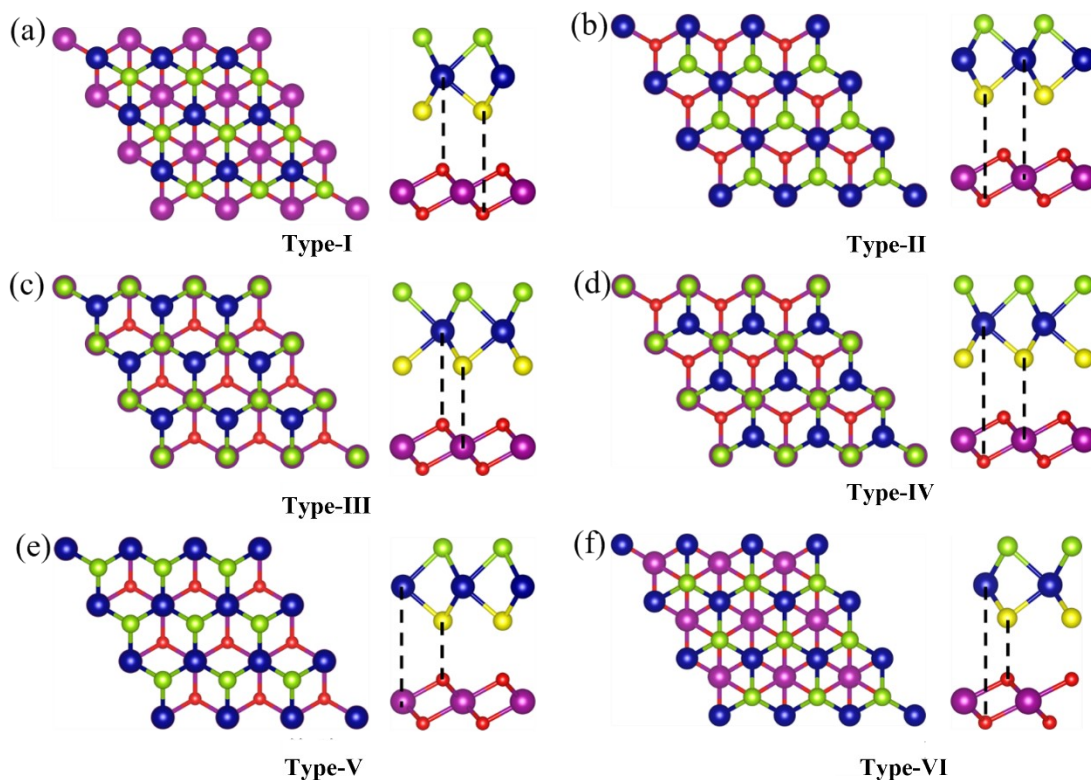

**Fig. S1** Structure of CrS2/MnO2 under different stacks on the contacting interface is S atom.

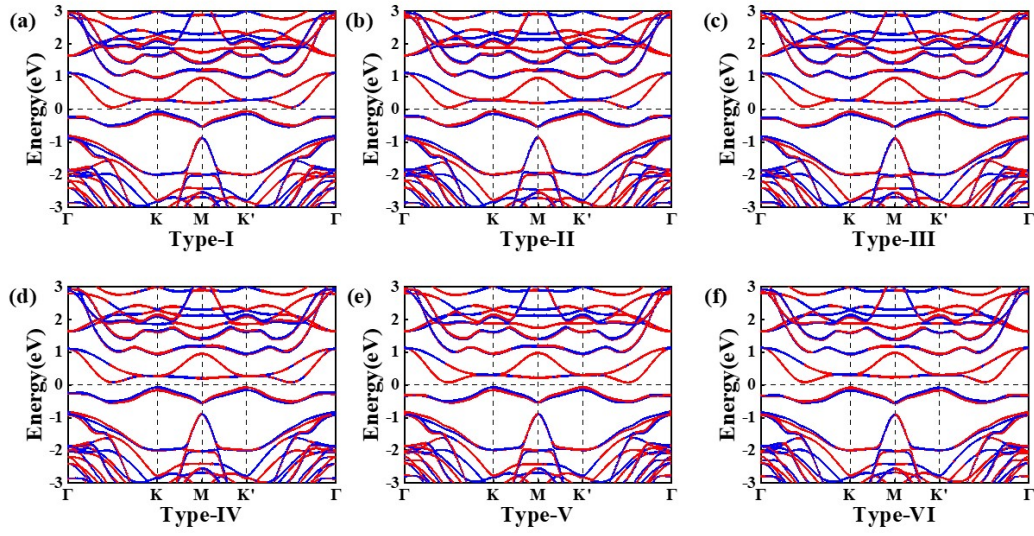

**Fig. S2** Band structures corresponding to each structure in the **Fig. S1**.

**Table S2** Berry curvature of different materials in papers.

| Materials                                       | Berry curvature (Bohr <sup>2</sup> ) |
|-------------------------------------------------|--------------------------------------|
| SnS <sup>1</sup>                                | 4                                    |
| TcIrGe <sub>2</sub> S <sub>6</sub> <sup>2</sup> | 9.48                                 |
| CrSSe (our materials)                           | 30.83                                |
| MoS <sub>2</sub> <sup>3</sup>                   | 62                                   |
| TiBrI <sup>4</sup>                              | 106                                  |

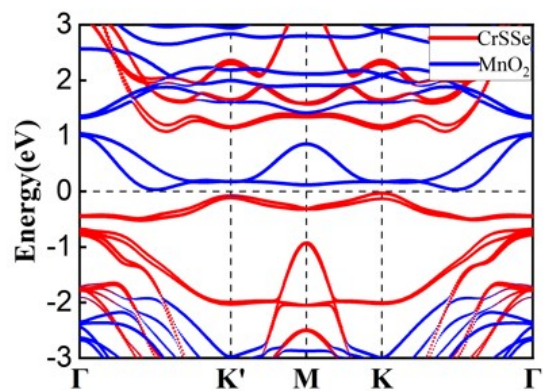

Fig. S3 The layer-resolved band structure of CrSSe/MnO<sub>2</sub>.

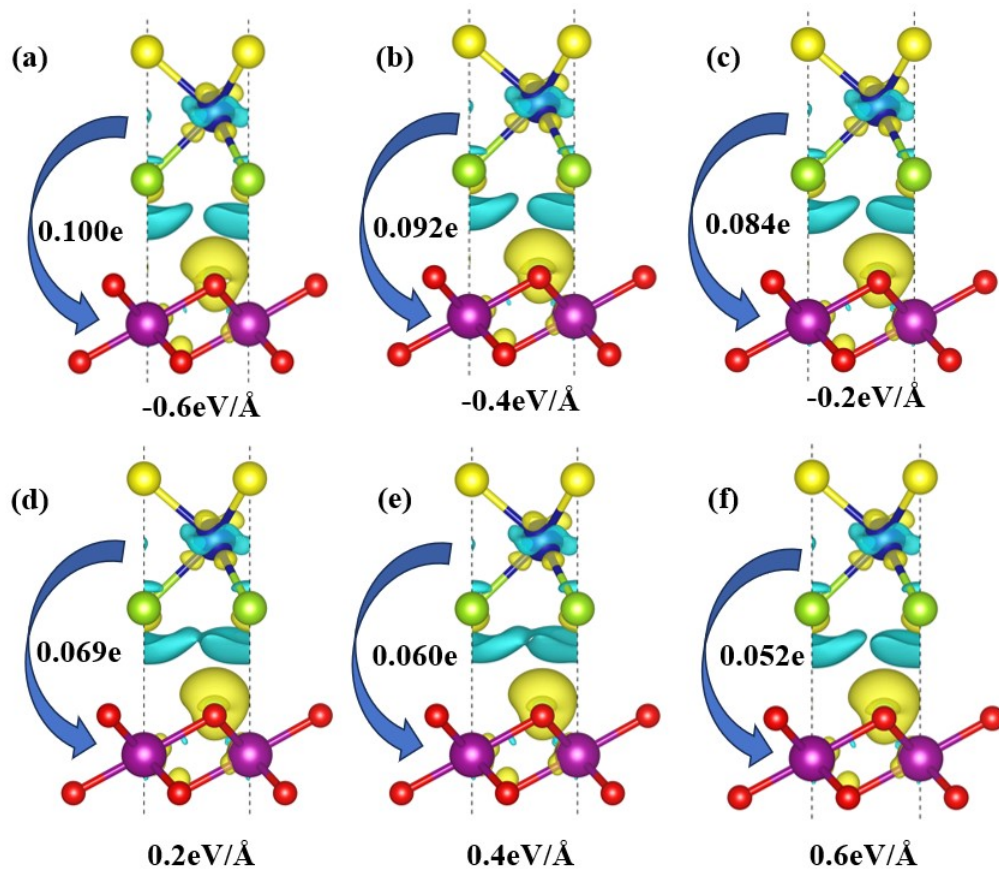

Fig. S4 The plot of charge density difference under different magnitudes of applied electric field.

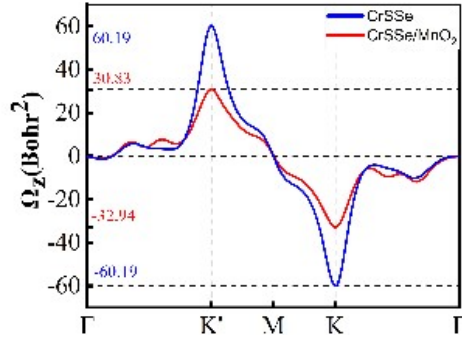

Fig. R1 Berry curvature of CrSSe (blue line) and CrSSe/MnO<sub>2</sub> (red line).

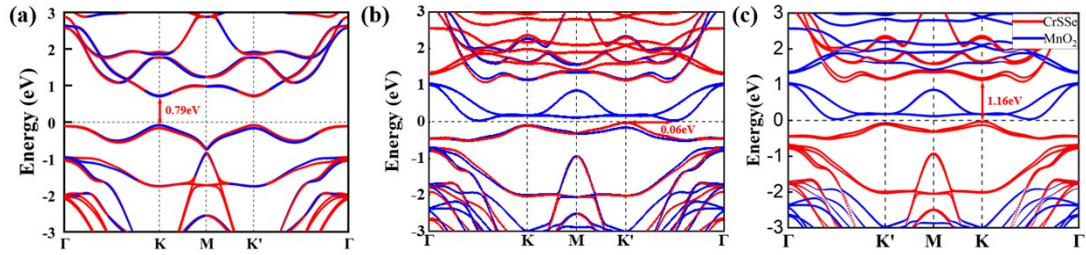

Fig. R2 The spin projected band structure of (a) CrSSe and (b) CrSSe/MnO<sub>2</sub>, and the material projected band structure of CrSSe/MnO<sub>2</sub>.

Table R1 Berry curvature of different materials in papers.

| Materials                                       | Berry curvature (Bohr <sup>2</sup> ) |
|-------------------------------------------------|--------------------------------------|
| SnS <sup>1</sup>                                | 4                                    |
| TcIrGe <sub>2</sub> S <sub>6</sub> <sup>2</sup> | 9.48                                 |
| CrSSe(our materials)                            | 30.83                                |
| MoS <sub>2</sub> <sup>3</sup>                   | 60                                   |
| TiBrI <sup>4</sup>                              | 106                                  |

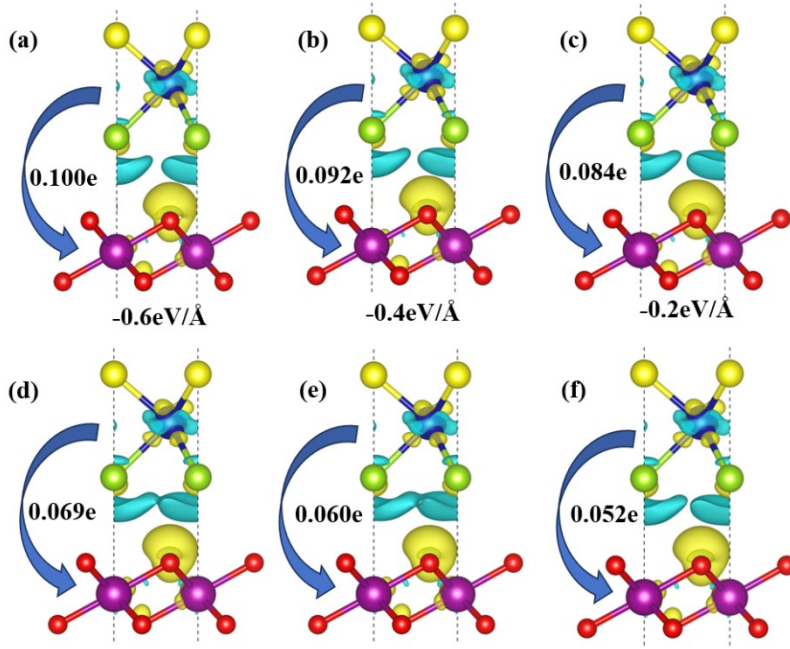

**Fig. R3** The plot of charge density difference under different magnitudes of applied electric field.

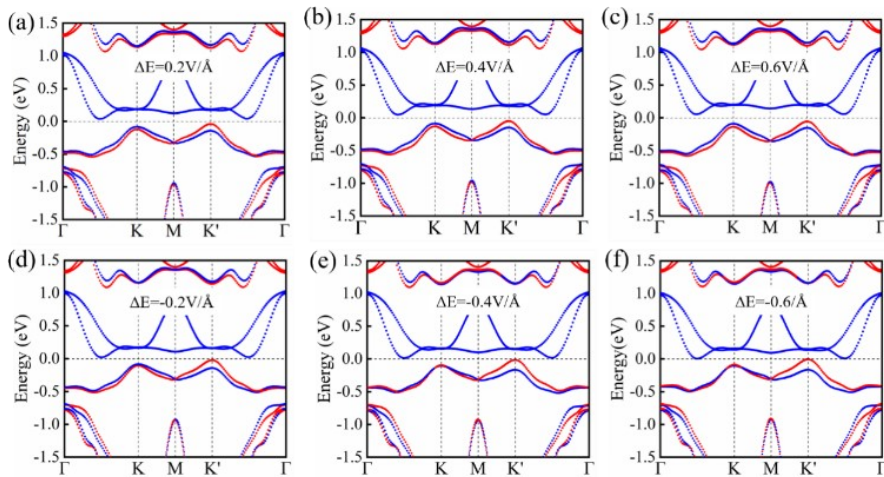

**Fig. R4** Spin projection energy bands of CrSSe/MnO<sub>2</sub> heterojunction under different electric field strengths (a) 0.2 V/Å, (b) 0.4 V/Å, (c) 0.6 V/Å, (d) -0.2 V/Å, (e) -0.2 V/Å, (f) -0.2 V/Å.

**Table R2** Valley polarization Values of different materials and stacking conditions

|       | I  | II | III | IV | V  | VI |
|-------|----|----|-----|----|----|----|
| CrSe2 | 48 | 42 | 30  | 28 | 17 | 32 |
| CrS2  | 13 | 19 | 15  | 14 | 12 | 22 |
| S     | 18 | 8  | 13  | 18 | 23 | 23 |

|    |    |    |    |    |   |    |
|----|----|----|----|----|---|----|
| Se | 29 | 80 | 60 | 71 | 2 | 32 |
|----|----|----|----|----|---|----|

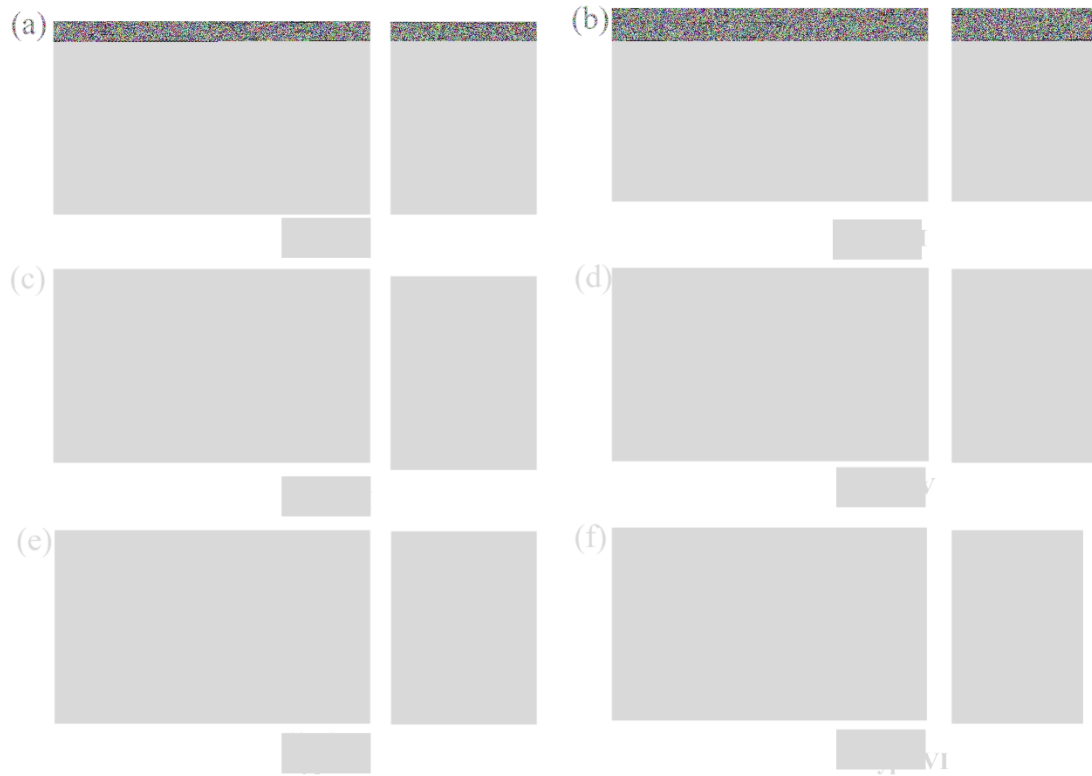

**Fig. R5 The Structure of the contacting interface is S atoms in heterojunctions.**

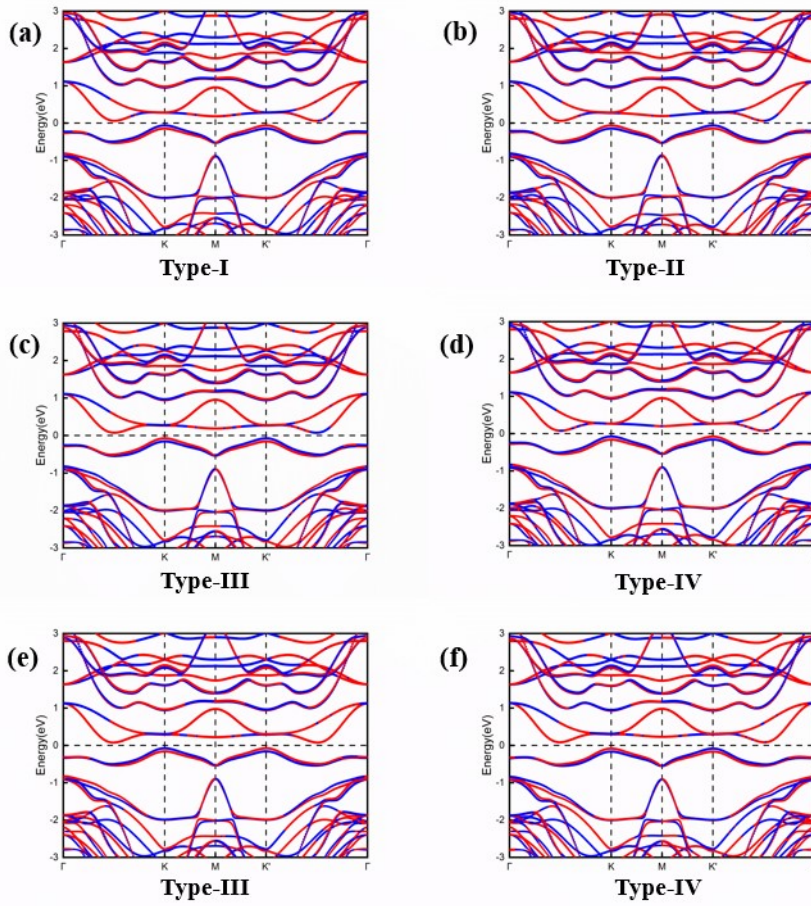

**Fig. R6** The band structure of the contacting interface is S atoms in heterojunctions.
