# Supplementary material for: Enhancement and modulation of valley polarization in Janus CrSSe with internal and external electric fields
Source: Royal Society of Chemistry journal article supplement (doi:10.1039/d3cp05298b), 2024-01-01

Electronic Supplementary Material (ESI) for Physical Chemistry Chemical Physics.  
This journal is © the Owner Societies 2024

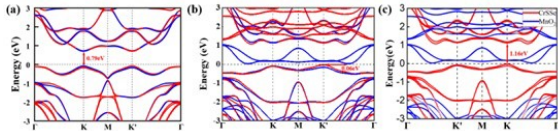

Supplement: d3cp05298b4.pdf [file d3cp05298b4.pdf]
