# Supplementary material for: Enhancement and modulation of valley polarization in Janus CrSSe with internal and external electric fields
Source: Royal Society of Chemistry journal article supplement (doi:10.1039/d3cp05298b), 2024-01-01
Supplement: d3cp05298b13.pdf [file d3cp05298b13.pdf]

## Supplementary Information

### Enhancement and Modulation of Valley Polarization in Janus CrSSe with Internal and External Electric Fields

Runxian Jiao<sup>a</sup>, Qingyuan Wei<sup>a</sup>, Lichuan zhang<sup>a</sup>, Yuee Xie<sup>a</sup>, Jingjing He<sup>\*b</sup>, Yangbo Zhou <sup>\*c</sup>, Lei Shen<sup>d</sup>, and Jiaren Yuan<sup>\*c</sup>

---

<sup>a</sup> School of Physics and Electronic Engineering, Jiangsu University, Zhenjiang 212013, China.

<sup>b</sup> College of Information Science and Technology, Nanjing Forestry University, Nanjing 210037, China.

<sup>c</sup> School of Physics and Materials Science, Nanchang University, Nanchang 330031, China.

<sup>d</sup> Department of Mechanical Engineering, National University of Singapore, 9 Engineering Drive 1, Singapore 117542, Singapore

†Correspondence: hejj@njfu.edu.cn(J.H.), yangbozhou@ncu.edu.cn(Y.Z.), jryuan@ncu.edu.cn (J.Y.);

**Table S1 Valley polarization Values of different materials and stacking conditions**

|       | I  | II | III | IV | V  | VI |
|-------|----|----|-----|----|----|----|
| CrSe2 | 48 | 42 | 30  | 28 | 17 | 32 |
| CrS2  | 13 | 19 | 15  | 14 | 12 | 22 |
| S     | 18 | 8  | 13  | 18 | 23 | 23 |
| Se    | 29 | 80 | 60  | 71 | 2  | 32 |

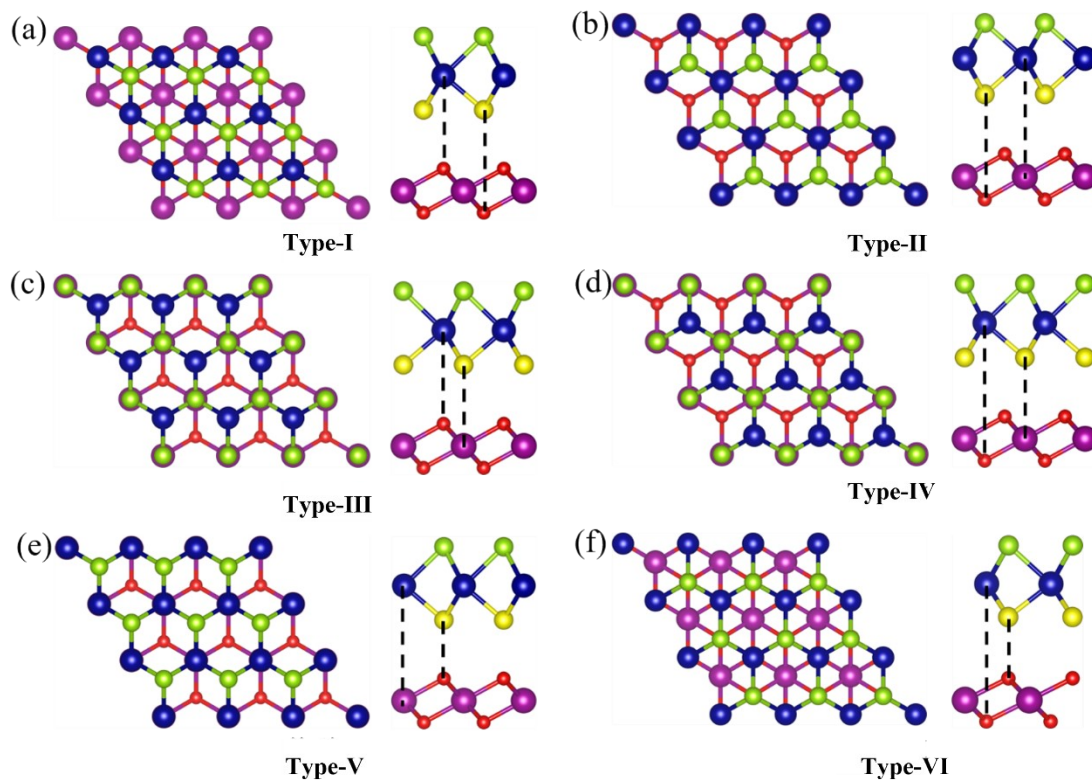

**Fig. S1** Structure of CrSSe/MnO2 under different stacks on the contacting interface is S atom.

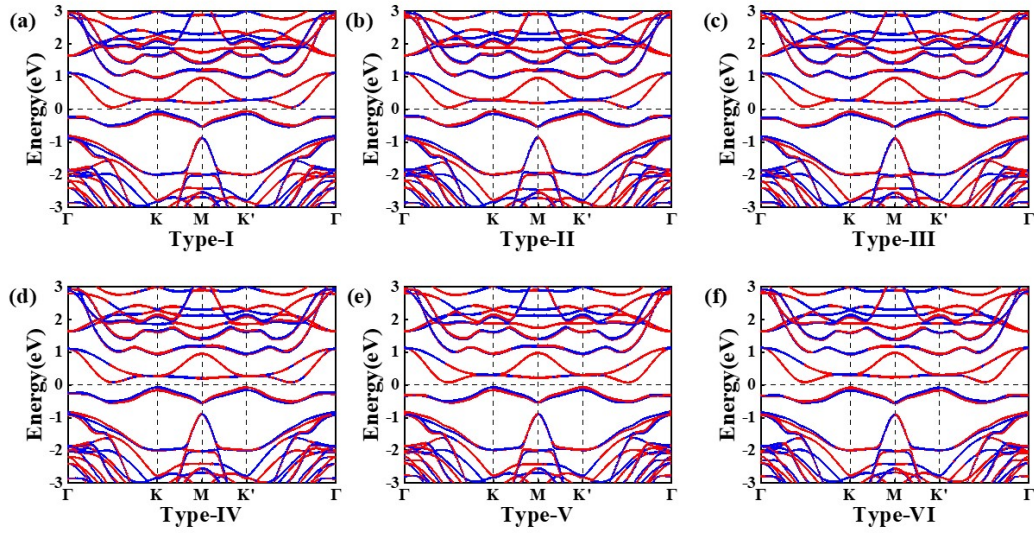

**Fig. S2** Band structures corresponding to each structure in the **Fig. S1**.

**Table S2** Berry curvature of different materials in papers.

| Materials                                       | Berry curvature (Bohr <sup>2</sup> ) |
|-------------------------------------------------|--------------------------------------|
| SnS <sup>1</sup>                                | 4                                    |
| TcIrGe <sub>2</sub> S <sub>6</sub> <sup>2</sup> | 9.48                                 |
| CrSSe (our materials)                           | 30.83                                |
| MoS <sub>2</sub> <sup>3</sup>                   | 62                                   |
| TiBrI <sup>4</sup>                              | 106                                  |

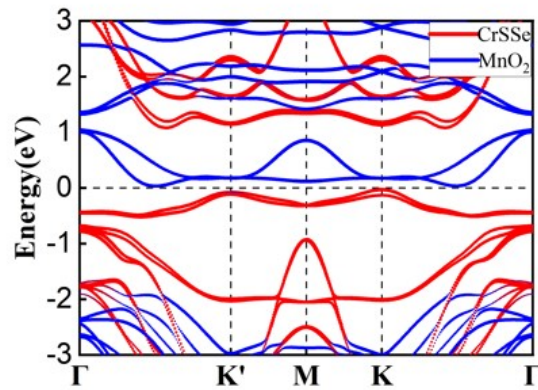

**Fig. S3** The layer-resolved band structure of CrSSe/MnO<sub>2</sub>.

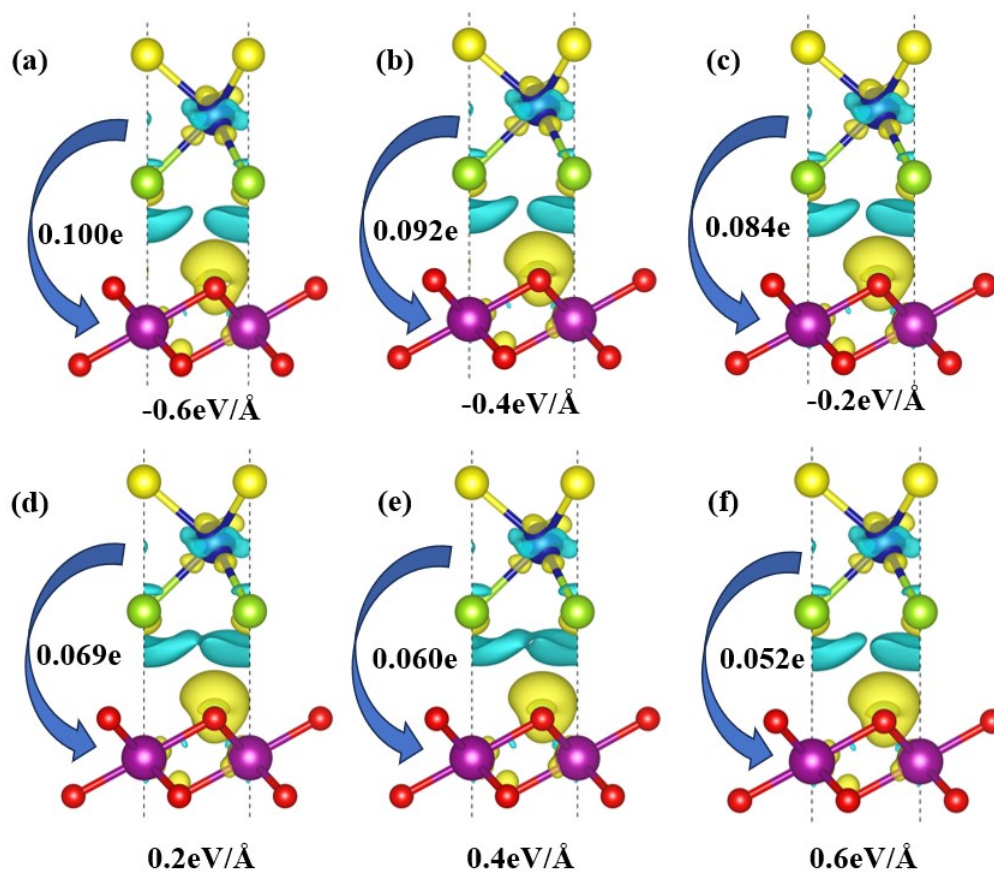

**Fig. S4** The plot of charge density difference under different magnitudes of applied electric field.

1. F. Is, R. Ahammed, P. Nandi, A. Rawat and A. De Sarkar, *Applied Surface Science*, 2023, **611**,155675.
2. J. Zhao, T. Zhang, R. Peng, Y. Dai, B. Huang and Y. Ma, *The Journal of Physical Chemistry Letters*, 2022, **13**, 8749-8754.
3. G. Yang, J. Li, Z. Liu, C. Li and X. Mao, *Physical Chemistry Chemical Physics*, 2019, **21**, 15151-15156.
4. T. Hu, G. Zhao, H. Gao, Y. Wu, J. Hong, A. Stroppa and W. Ren, *Physical Review B*, 2020, **101**,125401.
