# Supplementary figures and images for: Enhancement and modulation of valley polarization in Janus CrSSe with internal and external electric fields
Source: Royal Society of Chemistry journal article supplement (doi:10.1039/d3cp05298b), 2024-01-01

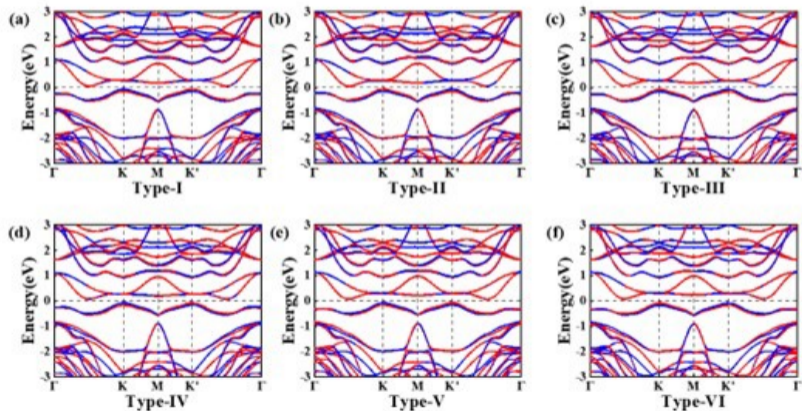

Supplement: d3cp05298b10.pdf [file d3cp05298b10.pdf]

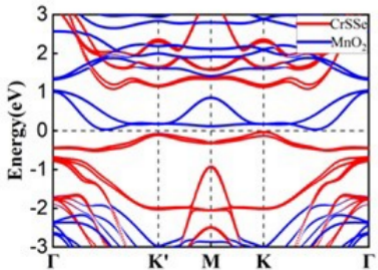

Supplement: d3cp05298b11.pdf [file d3cp05298b11.pdf]

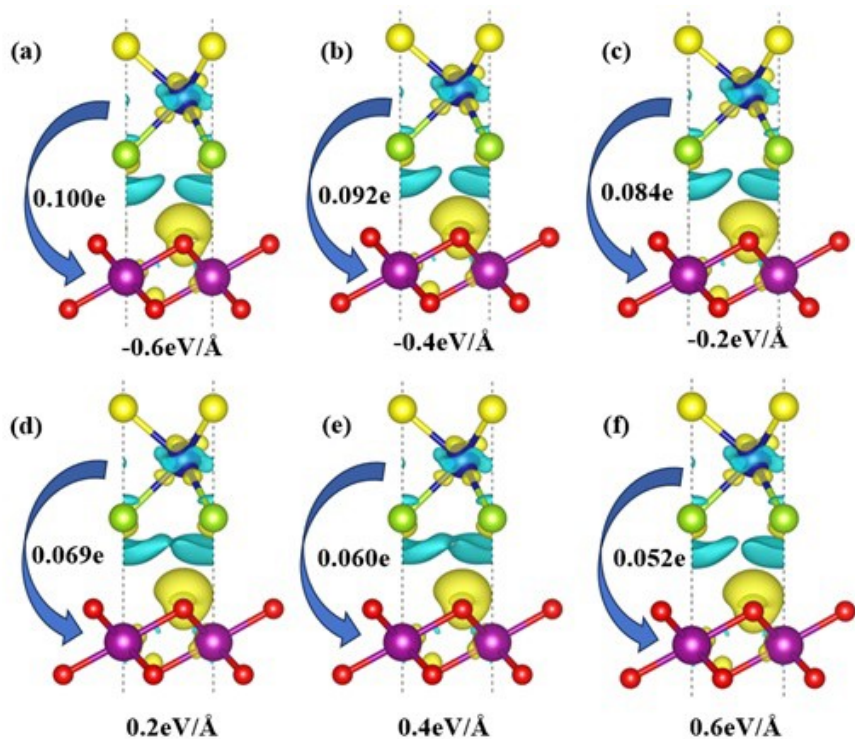

Supplement: d3cp05298b12.pdf [file d3cp05298b12.pdf]

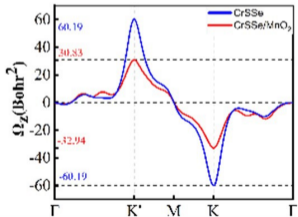

Supplement: d3cp05298b3.pdf [file d3cp05298b3.pdf]

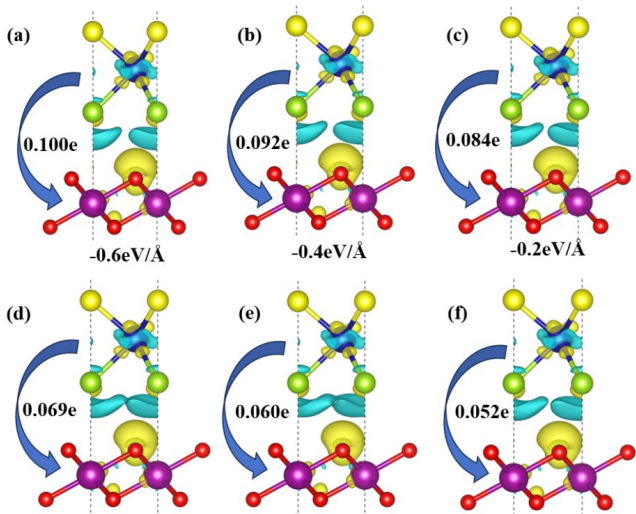

Supplement: d3cp05298b5.pdf [file d3cp05298b5.pdf]

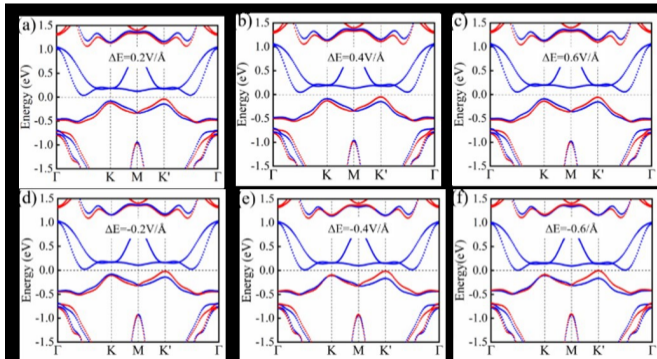

Supplement: d3cp05298b6.pdf [file d3cp05298b6.pdf]

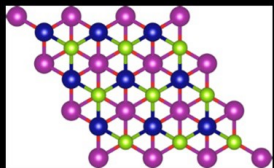

Type-I

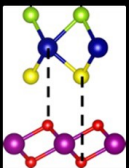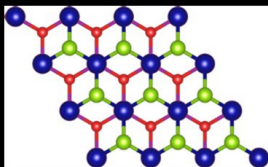

Type-II

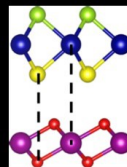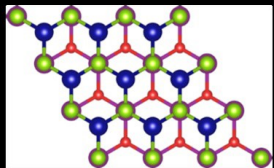

Type-III

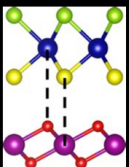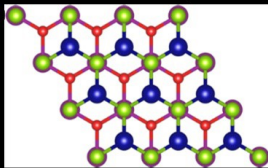

Type-IV

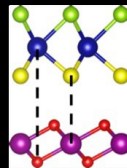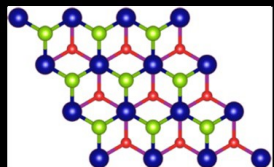

Type-V

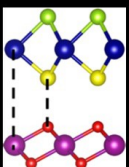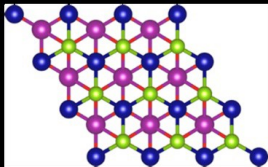

Type-VI

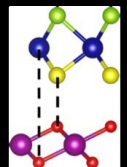

Supplement: d3cp05298b7.pdf [file d3cp05298b7.pdf]

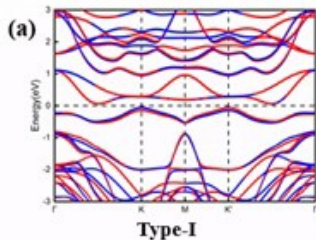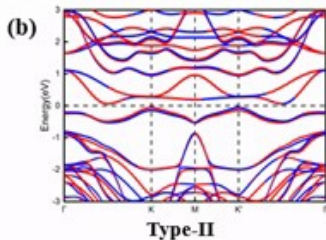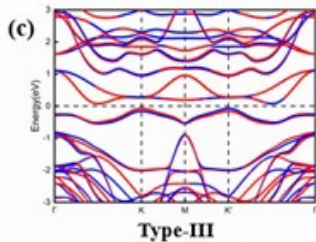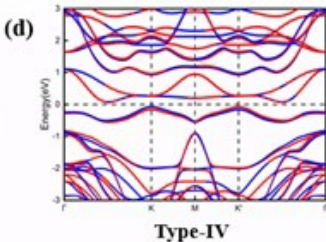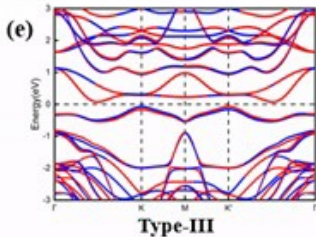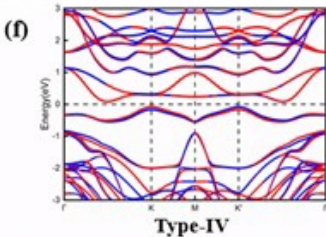

Supplement: d3cp05298b8.pdf [file d3cp05298b8.pdf]

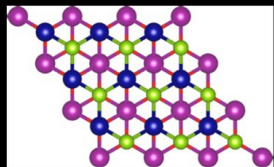

Type-I

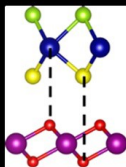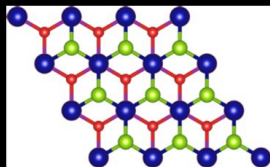

Type-II

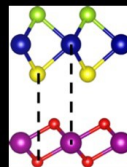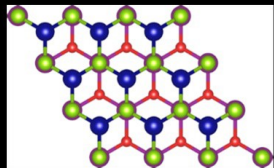

Type-III

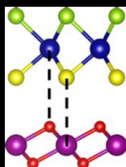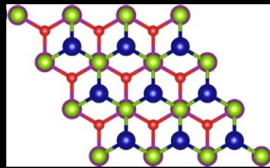

Type-IV

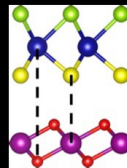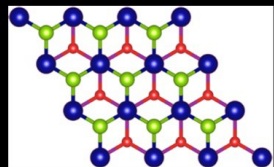

Type-V

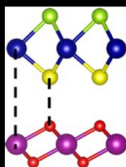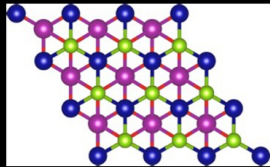

Type-VI

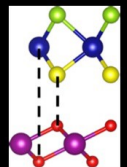

Supplement: d3cp05298b9.pdf [file d3cp05298b9.pdf]
